# Supplementary material for: N6-Methyladenine DNA Modification in the Woodland Strawberry (Fragaria vesca) Genome Reveals a Positive Relationship With Gene Transcription
Source: Front Genet. 2020 Jan 10;10:1288. doi: 10.3389/fgene.2019.01288 (PMC6967393; doi:10.3389/fgene.2019.01288)
Supplement: Data Sheet 5 — Supplementary_Inf04: 6mA site distribution in protein-coding genes and long noncoding RNA from v1.0 genome. [file DataSheet_5.xlsx]

## Sheet:  6mA site distribution 
The 6mA site distribution of protein-coding genes and lncRNA
6mA sites num.	Protein coding gene num.	lncRNA num.
1	4061	345
2	3044	220
3	2292	127
4	1579	108
5	1211	57
6	815	40
7	596	20
8	406	21
9	288	19
10	239	12
11	186	7
12	128	7
13	99	5
14	79	7
15	69	6
16	41	3
17	38	2
18	28	4
19	26	0
20	16	0
21	18	1
22	15	1
23	10	0
24	12	1
25	3	2
26	6	1
27	3	0
28	7	1
29	3	2
30	3	0
