# Supplementary material for: N6-Methyladenine DNA Modification in the Woodland Strawberry (Fragaria vesca) Genome Reveals a Positive Relationship With Gene Transcription
Source: Front Genet. 2020 Jan 10;10:1288. doi: 10.3389/fgene.2019.01288 (PMC6967393; doi:10.3389/fgene.2019.01288)
Supplement: Data Sheet 6 — Supplementary_Inf05: The 6mA number and 6mA occupancy in the regions 1 kb upstream and downstream from the transcription start sites (TSS) of the protein coding genes and long non-coding RNA (lncRNA) from v1.0 genome. [file DataSheet_6.xlsx]

## Sheet: protein coding gene
The 6mA number and 6mA occupancy in the regions 1 kb upstream and downstream around the protein coding gene(PCG) TSS.
Region around TSS	PCG_6mA_number	PCG_number	PCG_6mA_occupancy
up1000-950	1112	1036	0.0448349
up950-900	1125	1051	0.0454841
up900-850	1109	1038	0.0449215
up850-800	1105	1050	0.0454408
up800-750	1047	978	0.0423248
up750-700	1121	1054	0.0456139
up700-650	1140	1060	0.0458735
up650-600	1092	1033	0.0447051
up600-550	1083	1013	0.0438395
up550-500	1134	1045	0.0452244
up500-450	1119	1064	0.0460467
up450-400	1078	1010	0.0437097
up400-350	1082	1025	0.0443589
up350-300	1108	1042	0.0450946
up300-250	1060	1003	0.0434068
up250-200	1059	984	0.0425845
up200-150	939	905	0.0391656
up150-100	916	858	0.0371316
up100-50	826	772	0.0334098
up50-0	849	809	0.035011
down0-50	765	722	0.0312459
down50-100	716	678	0.0293418
down100-150	639	610	0.0263989
down150-200	658	637	0.0275674
down200-250	680	648	0.0280435
down250-300	666	642	0.0277838
down300-350	714	682	0.0295149
down350-400	662	631	0.0273077
down400-450	673	656	0.0283897
down450-500	706	679	0.029385
down500-550	738	705	0.0305102
down550-600	762	723	0.0312892
down600-650	744	713	0.0308565
down650-700	787	737	0.0318951
down700-750	784	746	0.0322846
down750-800	800	762	0.032977
down800-850	865	817	0.0353573
down850-900	831	793	0.0343186
down900-950	908	870	0.0376509
down950-1000	842	805	0.0348379

## Sheet: lncRNA
The 6mA number and 6mA occupancy in the regions 1 kb upstream and downstream around the lncRNA TSS.
Region around TSS	lncRNA_6mA_number	lncRNA_number	lncRNA_6mA_occupancy
up1000-950	83	78	0.0408163
up950-900	71	69	0.0361068
up900-850	75	73	0.0381999
up850-800	85	80	0.0418629
up800-750	82	82	0.0429095
up750-700	92	89	0.0465725
up700-650	66	64	0.0334903
up650-600	79	76	0.0397698
up600-550	90	86	0.0450026
up550-500	73	69	0.0361068
up500-450	78	74	0.0387232
up450-400	88	81	0.0423862
up400-350	87	82	0.0429095
up350-300	90	87	0.0455259
up300-250	84	76	0.0397698
up250-200	85	82	0.0429095
up200-150	84	77	0.040293
up150-100	85	79	0.0413396
up100-50	73	69	0.0361068
up50-0	79	71	0.0371533
down0-50	66	65	0.0340136
down50-100	59	59	0.0308739
down100-150	56	54	0.0282575
down150-200	58	55	0.0287807
down200-250	67	64	0.0334903
down250-300	52	50	0.0261643
down300-350	58	56	0.029304
down350-400	43	37	0.0193616
down400-450	60	57	0.0298273
down450-500	61	53	0.0277342
down500-550	65	59	0.0308739
down550-600	57	55	0.0287807
down600-650	71	68	0.0355835
down650-700	61	60	0.0313972
down700-750	66	65	0.0340136
down750-800	74	72	0.0376766
down800-850	71	68	0.0355835
down850-900	67	60	0.0313972
down900-950	74	70	0.03663
down950-1000	57	52	0.0272109
